# Supplementary material for: High-Fat Diets with Differential Fatty Acids Induce Obesity and Perturb Gut Microbiota in Honey Bee
Source: PubMed Central journal article supplement (PMC7830725; doi:10.3390/ijms22020834), 2021-01-15
Supplement: ijms-22-00834-s001.pdf [file ijms-22-00834-s001.pdf]

**Supplementary Materials:** Supplementary Table 1, Supplementary Figure 1 and 2.

**Supplementary Table 1.** Diet nutrient and energy composition in each diet.

|                     | <b>NDS</b> |         | <b>NDP</b> |         | <b>HFDS</b> |        | <b>HFDP</b> |        |
|---------------------|------------|---------|------------|---------|-------------|--------|-------------|--------|
|                     | g %        | kcal %  | g %        | kcal %  | g %         | kcal % | g %         | kcal % |
| <b>Protein</b>      | 4          | 4       | 4          | 4       | 4           | 3      | 4           | 3      |
| <b>Carbohydrate</b> | 94         | 92      | 94         | 93      | 88          | 80     | 88          | 80     |
| <b>Fat</b>          | 2          | 4       | 2          | 4       | 8           | 17     | 8           | 16     |
| <b>kcal/g</b>       | 4.1        |         | 4.1        |         | 4.4         |        | 4.4         |        |
| <b>Ingredient</b>   | g          | kcal    | g          | kcal    | g           | kcal   | g           | kcal   |
| <b>Casein</b>       | 2          | 8       | 2          | 8       | 2           | 8      | 2           | 8      |
| <b>Sucrose</b>      | 50         | 200     | 50         | 200     | 50          | 200    | 50          | 200    |
| <b>Soybean oil</b>  | 0.918      | 8.262   |            |         | 4.59        | 41.31  |             |        |
| <b>Palm oil</b>     |            |         | 0.912      | 8.208   |             |        | 4.56        | 41.04  |
| <b>Total</b>        | 52.918     | 216.262 | 52.912     | 216.208 | 56.59       | 249.31 | 56.56       | 249.04 |

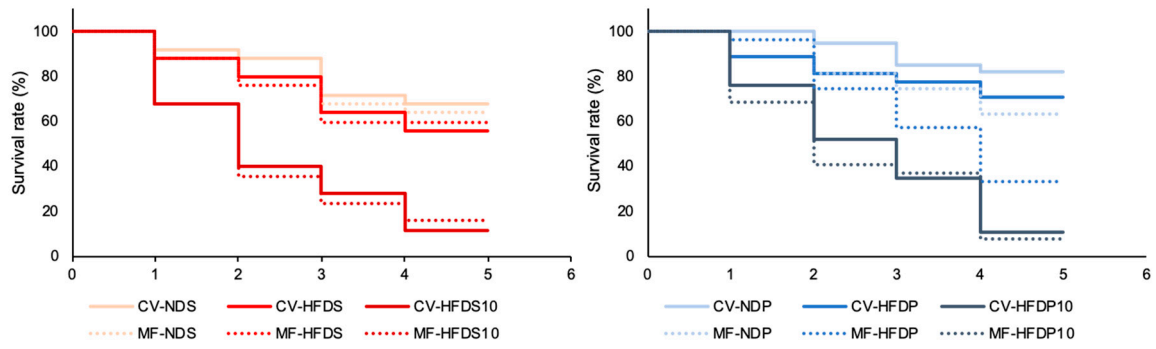

**Supplementary Figure 1.** Survival rates of honey bees in preliminary experiments. Dashed and solid lines correspond to MF and CV bees. Each line represents the average value of bee individuals ( $n = 25$ ) from three cup cages. ND, HFD and HFD10 represent for fed with normal dietary fat (1%), high fat diet (5% fat) and extra high fat diet (10% fat). S and P stands for soybean oil and palm oil. Day 0 is the first day feeding dietary fats to bees.

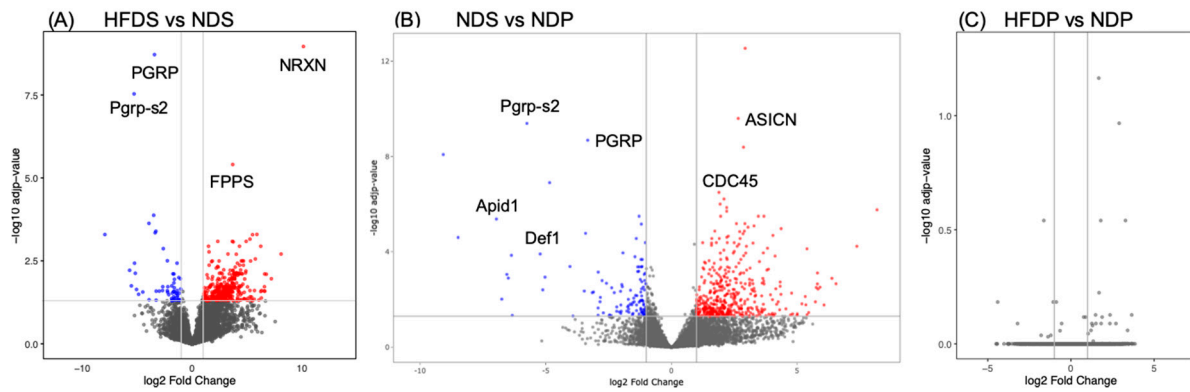

**Supplementary Figure 2.** Volcano plots of DEGs between (A) HFDS and NDS, (B) NDS and NDP, (C) HFDP and NDP (from left to right).
